# Supplementary material for: Insulin Resistance Is Associated with Multiple Chemical Sensitivity in a Danish Population-Based Study—DanFunD
Source: Int J Environ Res Public Health. 2021 Nov 30;18(23):12654. doi: 10.3390/ijerph182312654 (PMC8657139; doi:10.3390/ijerph182312654)
Supplement: Supplementary file 1 [file ijerph-18-12654-s001.zip › ijerph-1462800-supplementary.pdf]

### Supplementary Table S1

Associations with markers of lipid and glucose metabolism in MCS + *FSD* and MCS *±FSD*, compared to the controls; adjusted for Cohens Perceived Stress scale.

|                            | MCS + <i>FSD</i> |                                       | MCS <i>±FSD</i> |                                       |
|----------------------------|------------------|---------------------------------------|-----------------|---------------------------------------|
|                            | n cases/total n  | % difference<br>(95% CI) <sup>a</sup> | n cases/total n | % difference<br>(95% CI) <sup>a</sup> |
| <b>Total cholesterol</b>   | 186/7950         | -1 (-4, 2)                            | 157/6581        | 1 (-2, 5)                             |
| <b>HDL-cholesterol</b>     | 186/7952         | 1 (-2, 5)                             | 157/6582        | 0.9 (-4, 6)                           |
| <b>Non HDL-cholesterol</b> | 183/7890         | -2 (-6, 1)                            | 155/6543        | 1 (-4, 6)                             |
| <b>Triglycerides</b>       | 186/7952         | 2 (-6, 11)                            | 157/6582        | 4 (-7, 16)                            |
| <b>Glucose</b>             | 179/7590         | 1 (-1, 3)                             | 155/6562        | 2 (-1, 4)                             |
| <b>HbA1c</b>               | 178/7419         | 1 (-1, 3)                             | 155/6414        | 2 (0.5, 4)*                           |
| <b>Insulin</b>             | 172/7314         | 24 (14, 35)*                          | 149/6322        | 14 (0.7, 28)*                         |
| <b>HOMA-IR</b>             | 171/7295         | 34 (22, 47)*                          | 148/6308        | 25 (10, 42)*                          |

a) Adjusted for age, sex, physical activity, BMI, waist circumference, and Cohens perceived stress scale.

\*p-value <0.05. Diabetes cases are excluded from analyses on glucose, HbA1c, insulin, HOMA-IR.

**Supplementary Table S2**

Sensitivity analysis including additional adjustment for known heart diseases, depression, anxiety, self-perceived health status, and self-perceived physical fitness on the associations between lipid and glucose metabolism markers in MCS +FSD and MCS ÷FSD compared to the controls.

|                     | MCS ÷FSD        |                                    | MCS ÷FSD        |                                    |
|---------------------|-----------------|------------------------------------|-----------------|------------------------------------|
|                     | n cases/total n | % difference (95% CI) <sup>a</sup> | n cases/total n | % difference (95% CI) <sup>a</sup> |
| Total cholesterol   | 157/6581        | -1 (-4, 2)                         | 96/6677         | 1 (-2, 5)                          |
| HDL-cholesterol     | 157/6582        | 0.1 (-4, 4)                        | 96/6378         | -1 (-5, 4)                         |
| Non HDL-cholesterol | 155/6543        | -2 (-5, 2)                         | 94/6637         | 2 (-2, 7)                          |
| Triglycerides       | 157/6582        | 4 (-4, 14)                         | 96/6678         | 7 (-5, 20)                         |
| Glucose             | 155/6562        | 0.2 (-2, 2)                        | 96/6658         | 3 (0.3, 5)*                        |
| HbA1c               | 155/6414        | 1 (-1, 3)                          | 97/6668         | 3 (1, 5)*                          |
| Insulin             | 149/6322        | 4 (-6, 15)                         | 91/6413         | 14 (1, 28)*                        |
| HOMA-IR             | 148/6308        | 6 (-5, 18)                         | 91/6399         | 25 (10, 42)*                       |

a) Adjusted for age, sex, BMI, physical activity, waist circumference, known heart diseases as well as depression, anxiety, self-perceived health status, and self-perceived physical fitness.

\*p<0.05. Diabetes individuals and statin users were excluded from all analyses.

### Supplementary Table S3

Effect modification of Cohens Perceived Stress scale on the associations with lipid and glucose metabolism markers in MCS +FSD and MCS ÷FSD compared to the controls.

|                     | MCS +FSD        |                                    |                                                                | MCS ÷FSD        |                                    |                                                                |
|---------------------|-----------------|------------------------------------|----------------------------------------------------------------|-----------------|------------------------------------|----------------------------------------------------------------|
|                     | n cases/total n | % difference (95% CI) <sup>a</sup> | Test for interaction of Cohens perceived stress scale, p-value | n cases/total n | % difference (95% CI) <sup>a</sup> | Test for interaction of Cohens perceived stress scale, p-value |
| Total cholesterol   | 157/6581        | 0.2 (-1, 0.6)                      | 0.27                                                           | 96/6677         | 0.7 (0.1, 1)                       | 0.01                                                           |
| HDL-cholesterol     | 157/6582        | -1 (-2, 1)                         | 0.05                                                           | 96/6378         | -1 (-1, 0.7)                       | 0.81                                                           |
| Non HDL-cholesterol | 155/6543        | 0.5 (0.0, 1)                       | 0.07                                                           | 94/6637         | 1 (0.2, 2)                         | 0.01                                                           |
| Triglycerides       | 157/6582        | -1 (-2, 0.8)                       | 0.43                                                           | 96/6678         | -1 (-3, 2)                         | 0.93                                                           |
| Glucose             | 155/6562        | 0.1 (-1, 0.4)                      | 0.54                                                           | 96/6658         | 0.2 (-1, 0.6)                      | 0.27                                                           |
| HbA1c               | 155/6414        | 0.2 (-1, 0.4)                      | 0.14                                                           | 95/6666         | 0.4 (0.0, 0.7)                     | 0.03                                                           |
| Insulin             | 149/6322        | 0.0 (-2, 2)                        | 0.95                                                           | 91/6413         | -1 (-4, 2)                         | 0.51                                                           |
| HOMA-IR             | 148/6308        | 0.3 (-2, 2)                        | 0.77                                                           | 91/6399         | 0.2 (-3, 3)                        | 0.89                                                           |

a) Effect of

Cohens perceived stress scale on biomarker levels in MCS individuals vs controls adjusted for sex and age. Diabetes individuals and statin users were excluded from all analyses.
